# Supplementary material
Source: MDPI journal article supplement (https://www.mdpi.com/2225-1154/11/1/15)
Supplement: s1 [file s1]

# Assessment of the Spatial Variation in the Occurrence and Intensity of Major Hurricanes in the Western Hemisphere

## Supplementary Materials

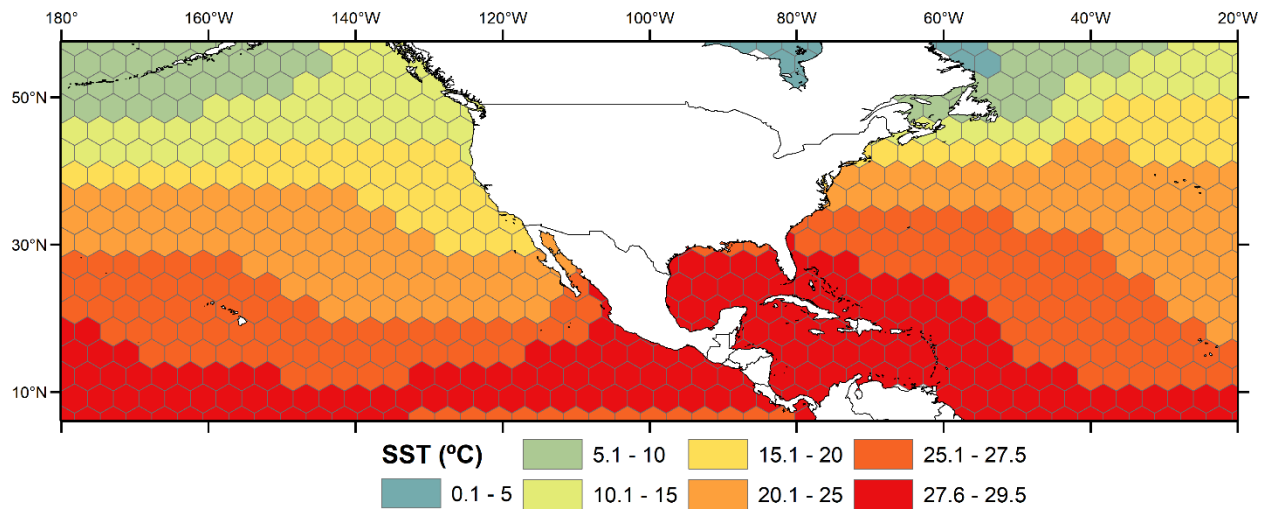

**Figure S1.** Average SST during the hurricane season

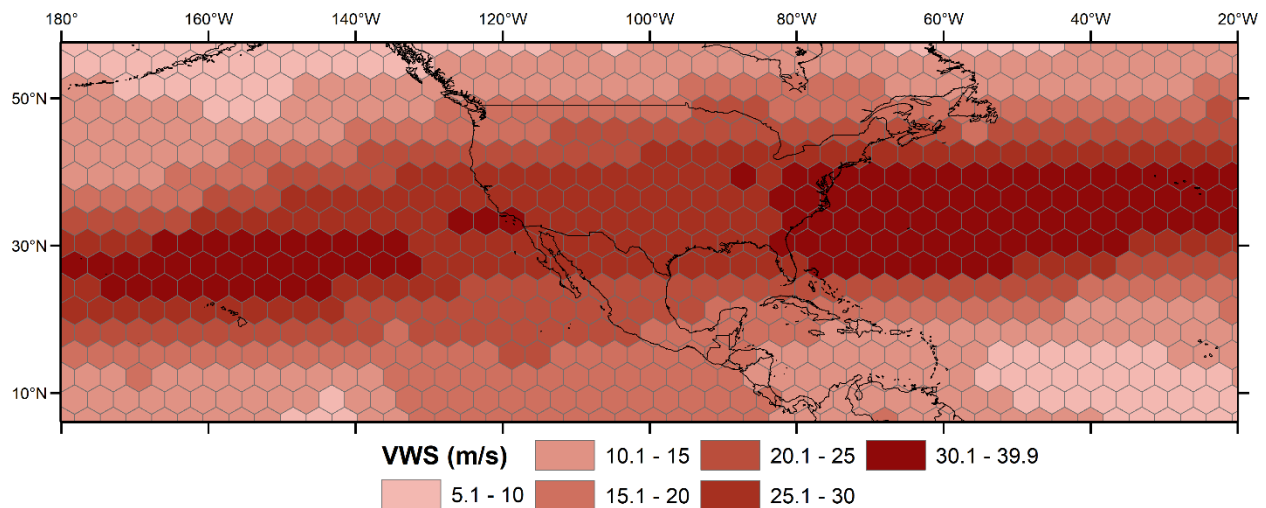

**Figure S2.** Average VWS during the hurricane season

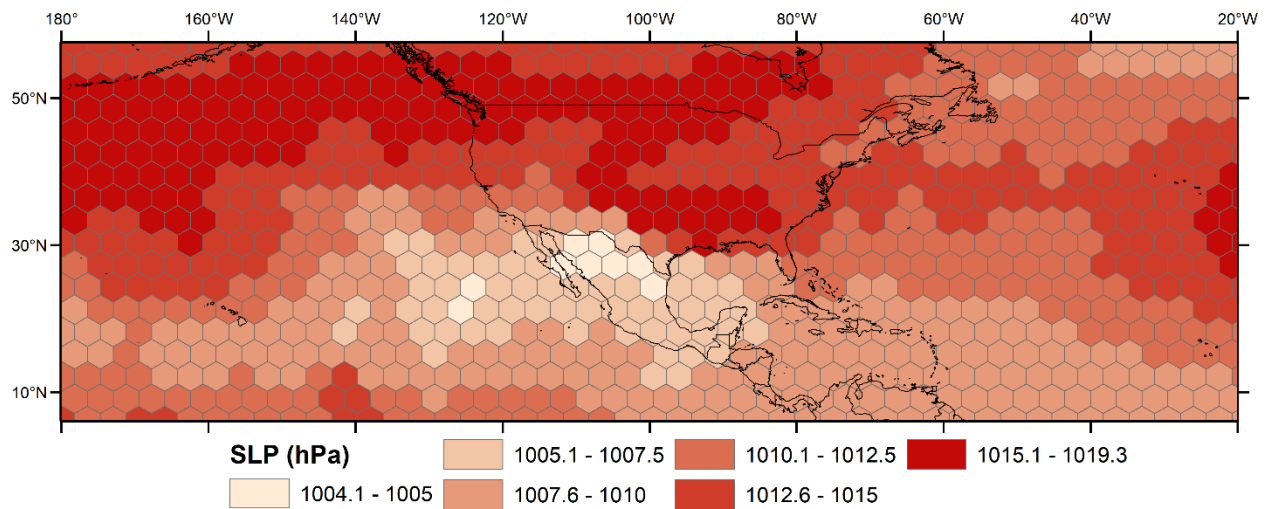

**Figure S3.** Average SLP during the hurricane season

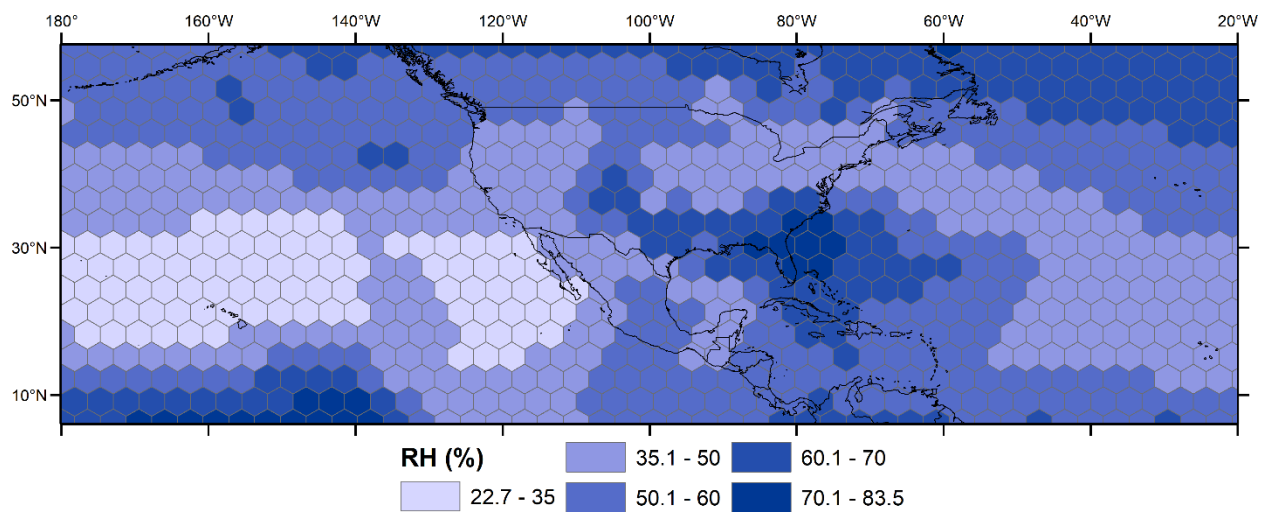

**Figure S4.** Average RH during the hurricane season

**Table S1.** Correlation matrix of climatic indices annual time series

|        | AMO   | PDO   | NAO   | NINO34 | PNA  | TNI   |
|--------|-------|-------|-------|--------|------|-------|
| TNA    | 0.93  | -0.02 | -0.55 | 0.06   | 0.33 | -0.14 |
| TNI    | -0.22 | 0.00  | 0.00  | -0.20  | 0.13 |       |
| PNA    | 0.28  | 0.17  | -0.12 | 0.02   |      |       |
| NINO34 | 0.03  | 0.51  | 0.01  |        |      |       |
| NAO    | -0.55 | 0.03  |       |        |      |       |
| PDO    | -0.09 |       |       |        |      |       |

**Table S2.** Correlation matrix of NA and NEP basin physical variable time series and climate indices

| NA     |       |       |       |       | NEP    |       |       |       |       |
|--------|-------|-------|-------|-------|--------|-------|-------|-------|-------|
|        | VWS   | SLP   | SST   | RH    |        | VWS   | SLP   | SST   | RH    |
| AMO    | 0.06  | 0.12  | 0.91  | 0.00  | AMO    | -0.02 | -0.04 | 0.33  | 0.07  |
| PDO    | 0.11  | 0.58  | -0.08 | -0.04 | PDO    | -0.08 | 0.74  | 0.58  | 0.13  |
| NAO    | -0.22 | -0.01 | -0.41 | 0.13  | NAO    | 0.29  | 0.15  | -0.04 | -0.29 |
| NINO34 | 0.05  | 0.34  | 0.11  | -0.09 | NINO34 | -0.09 | 0.73  | 0.66  | 0.09  |
| PNA    | 0.02  | 0.20  | 0.37  | -0.05 | PNA    | 0.01  | 0.07  | 0.15  | 0.01  |
| TNI    | 0.00  | -0.02 | -0.26 | 0.03  | TNI    | 0.04  | -0.15 | -0.47 | -0.02 |
| TNA    | 0.07  | 0.21  | 0.81  | 0.02  | TNA    | -0.02 | -0.06 | 0.28  | 0.09  |
| RH     | -0.15 | 0.05  | -0.01 |       | RH     | -0.89 | 0.10  | 0.11  |       |
| SST    | -0.02 | 0.05  |       |       | SST    | -0.12 | 0.69  |       |       |
| SLP    | 0.00  |       |       |       | SLP    | -0.08 |       |       |       |
